# Supplementary material for: Identification of MEK162 as a Radiosensitizer for the Treatment of Glioblastoma
Source: Oxford University Press journal article supplement (doi:10.1158/1535-7163.mct-17-0480), 2017-09-27
Supplement: 15357163mct170480-sup-183799_2_supp_4253245_7vv2zv.pdf [file 15357163mct170480-sup-183799_2_supp_4253245_7vv2zv.pdf]

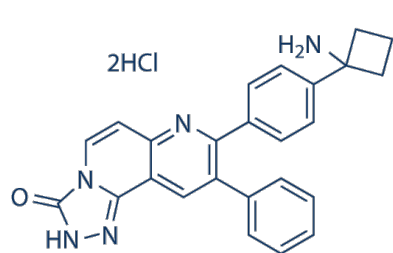

MK-2206

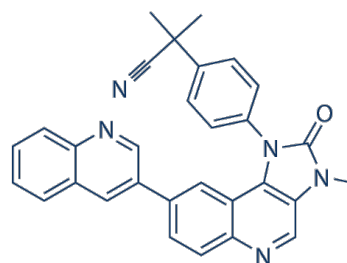

BEZ235

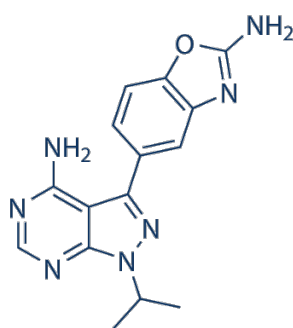

MLN0128

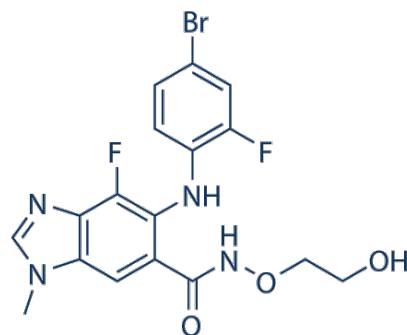

MEK162

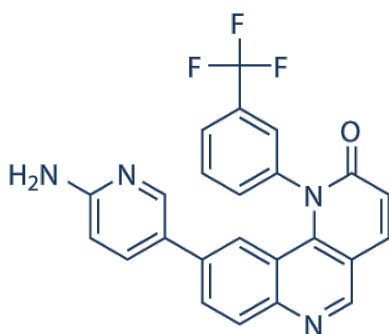

Torin2

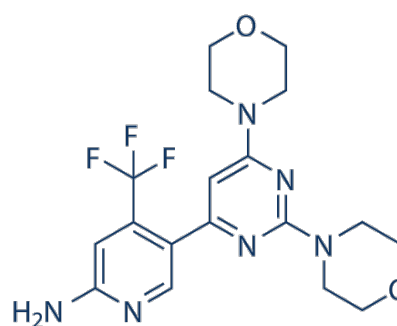

BKM120

**Supplemental Figure 1.** Chemical structures of non-FDA approved compounds used in the study.



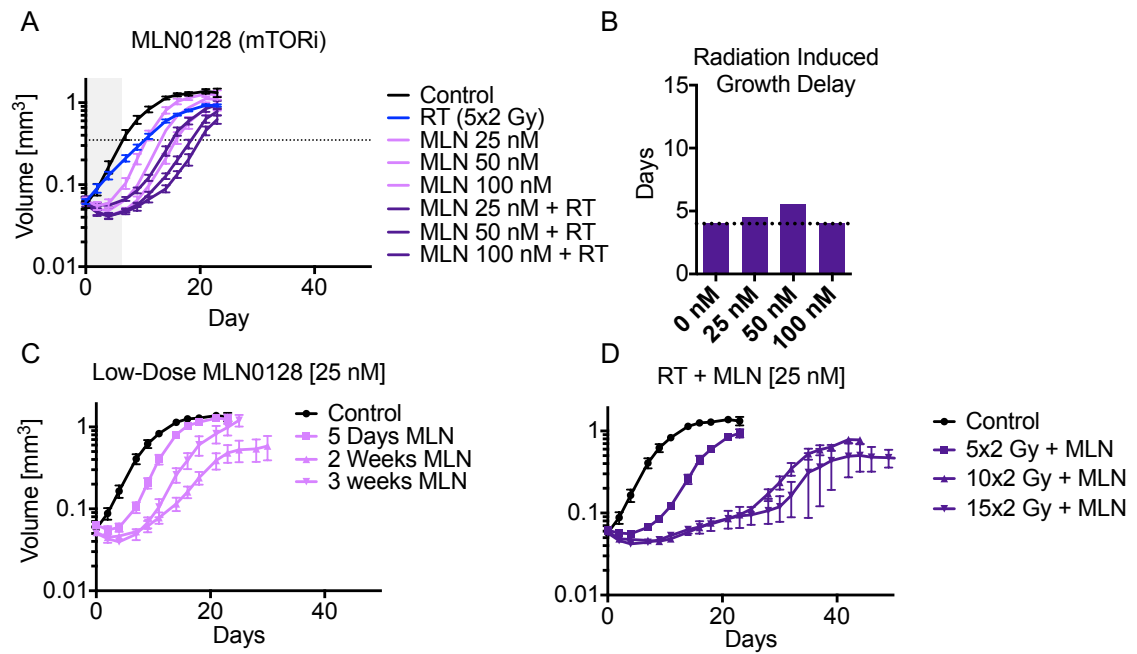

**Supplemental Figure 3. mTOR inhibition does not show dose dependent radiosensitization.** (A,C, D) Points are averages of 12 spheroids at each point,  $\pm$ SD. B) Radiation induced growth delay for each concentration of MLN0128.

**A**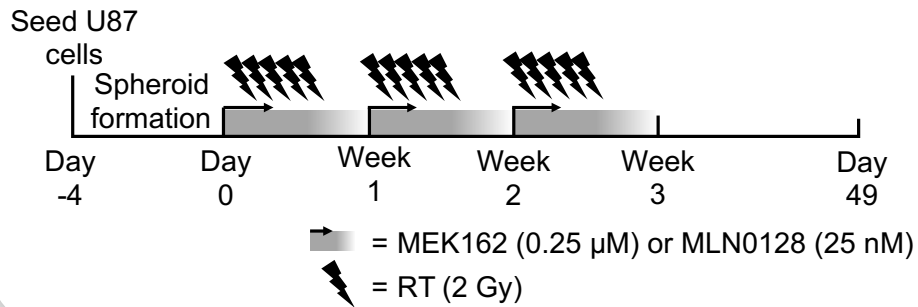**B**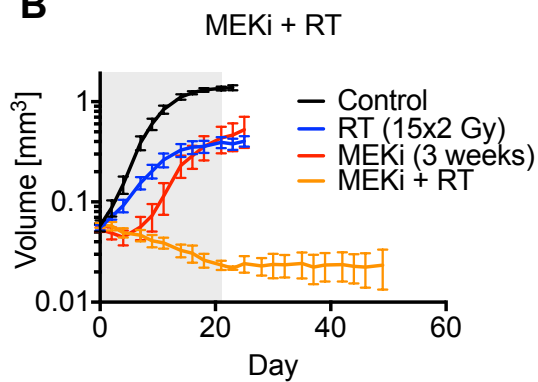**C**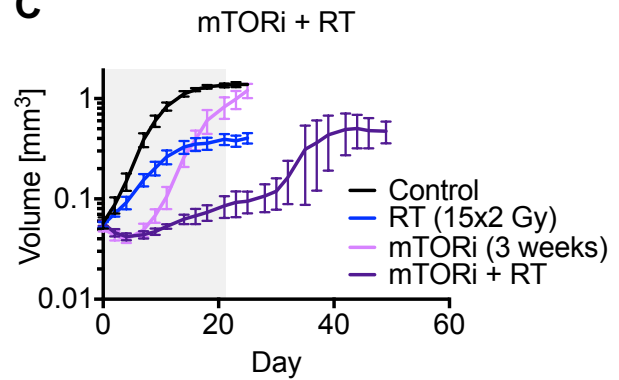

**Supplemental Figure 4. MEK162 + RT abrogate spheroid regrowth.** A) Schematic overview of experimental setup. Drug was refreshed at the beginning of each week B) Growth of U87 spheroids with low-dose MEK162 (0.25  $\mu$ M) and 15x2 Gy irradiation. Error bars show SD (n=12). C) Growth of U87 spheroids with low-dose MLN0128 (0.25  $\mu$ M) and 15x2 Gy irradiation. Error bars show SD (n=12). D) Control graph, Spheroids treated with MEK162 alone for different time periods.

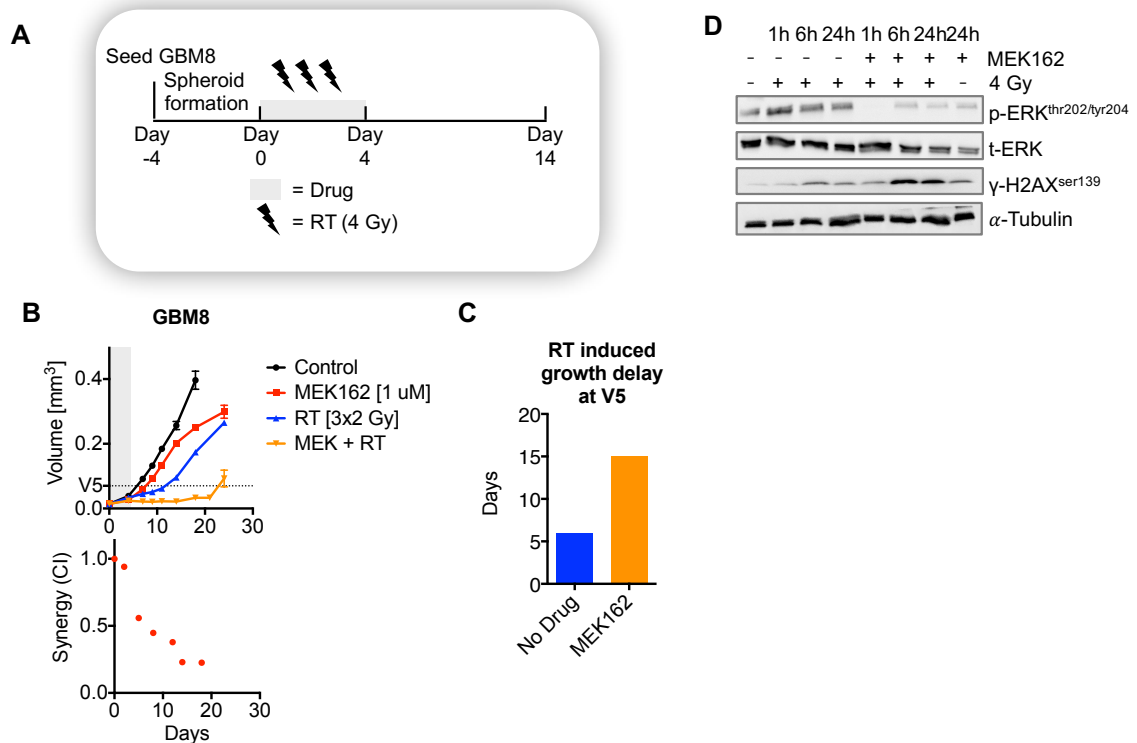

**Supplemental Figure 5. MEK162 radiosensitizes GBM8 primary spheroid culture and increases  $\gamma$ H2AX levels.** A) Schematic overview experimental setup. GBM8 cells were treated for 4 days with 1  $\mu$ M MEK162 and 3 x 2 Gy irradiation and size was measured up to 14 days after start of treatment. B) Growth of GBM8 spheroids with combination index at each measurement. Error bars show SD (n=12). D) Combination index of MEK+RT at each time point. D) GBM8 cells were treated with 1  $\mu$ M MEK162 and/or 4 Gy and cells were lysed at indicated time-points.

**A**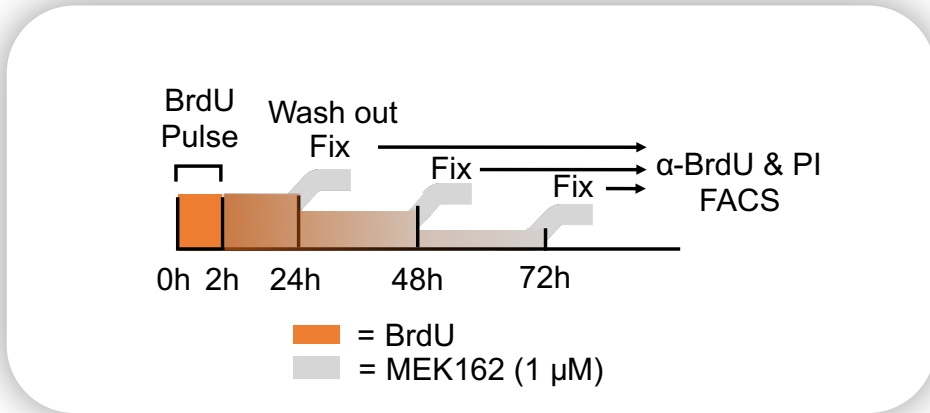**B**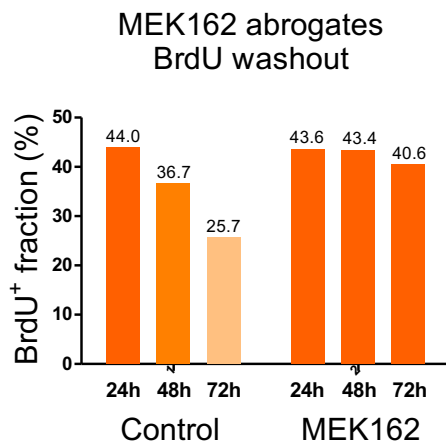**C**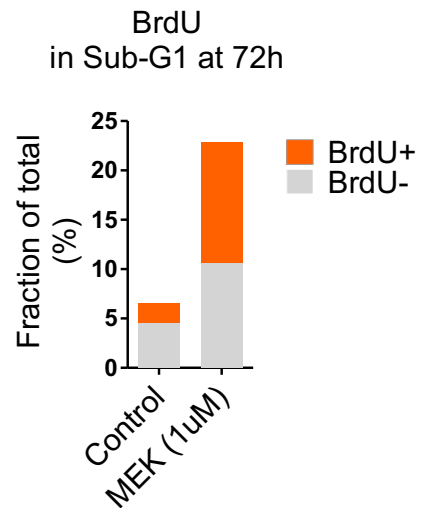

**Supplemental Figure 6. MEK162 abrogates BrdU washout and increases sub-G1 accumulation of BrdU+ cells.** A) Schematic overview of BrdU washout setup. B) Fraction of BrdU+ cells of the total amount of cells. C) Fraction of BrdU+ cells in sub-G1.

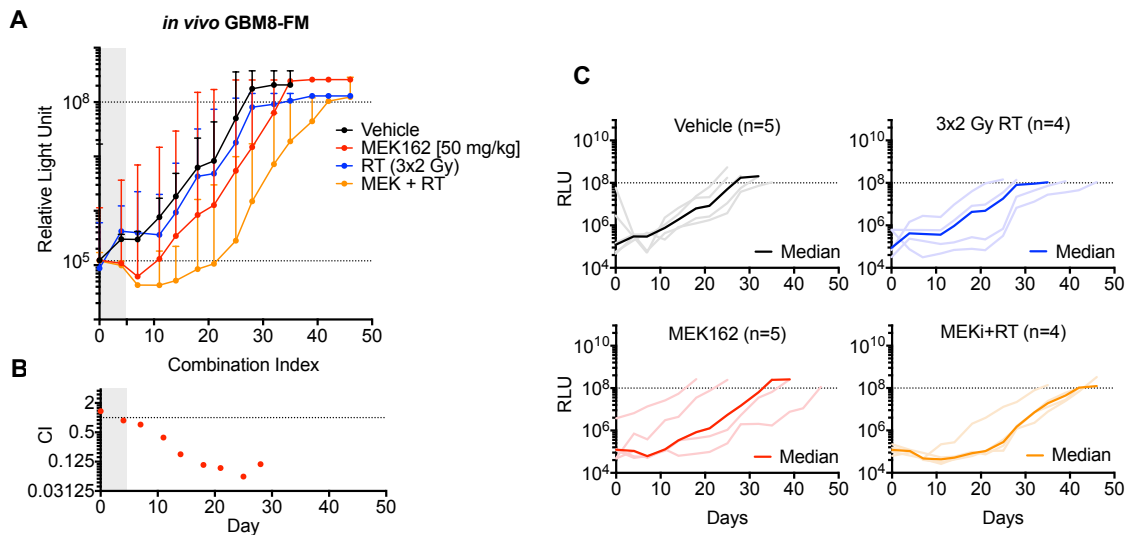

**Supplemental Figure 7. MEK162 + RT in vivo.** A) Bioluminescence of GBM8-FM cells in vivo. Medians over 4-5 mice are shown for each time point, error bars indicate interquartile range. B) Combination index for the combinatorial treatment at each time point. C) Tumor growth of each tumor separate with median growth.

Supplemental Table 1: Antibodies used

| Target                              | Cell Signaling# |
|-------------------------------------|-----------------|
| total-ERK                           | #4695           |
| phospho-p44/42- ERK                 | #4370           |
| phospho-H2AX                        | #9718           |
| total-CDK1                          | #9116           |
| phospho-CDK1                        | #9111           |
| total-CDK2                          | #2546           |
| phospho-CDK2                        | #2561           |
| WEE1                                | #4936           |
| total-ATM                           | #2873           |
| phospho-ATM                         | #5883           |
| total-CHK2                          | #6334           |
| phospho-CHK2                        | #2197           |
| with loading control $\beta$ -Actin | #3700           |



Supplemental Table 2: Gene signature MEK+RT response

| Positive Correlating |         |            | Negative Correlating |         |            |
|----------------------|---------|------------|----------------------|---------|------------|
| Gene                 | R-value | pvalue     | Gene                 | R-value | pvalue     |
| RHEB                 | 0.936   | 0.34921308 | LINC00472            | -0.971  | 0.13857833 |
| PTGDR                | 0.918   | 0.40075257 | MYO16                | -0.969  | 0.08397032 |
| TAGLN2               | 0.889   | 0.52291603 | SRCAP                | -0.958  | 0.16498223 |
| CES3                 | 0.872   | 0.55621899 | HESX1                | -0.951  | 0.20313991 |
| LRP10                | 0.862   | 0.6051217  | ROBO1                | -0.941  | 0.30857065 |
| ETV7                 | 0.858   | 0.62805255 | EYA2                 | -0.932  | 0.3603438  |
| ATG9A                | 0.85    | 0.61698983 | CTNND2               | -0.93   | 0.35971613 |
| TAX1BP1              | 0.848   | 0.56671343 | SYNCRIP              | -0.926  | 0.38649705 |
| LEPROT               | 0.845   | 0.56060762 | COTL1                | -0.925  | 0.35911979 |
| MON2                 | 0.845   | 0.56550334 | C9orf114             | -0.919  | 0.41489475 |
| EEA1                 | 0.842   | 0.56923133 | CAP2                 | -0.917  | 0.38034072 |
| SLC37A1              | 0.835   | 0.58243946 | NUFIP1               | -0.914  | 0.408534   |
| VPS52                | 0.834   | 0.56822245 | LGI2                 | -0.91   | 0.44793719 |
| DFNA5                | 0.828   | 0.59456916 | FANCC                | -0.906  | 0.47986416 |
| TNNI3                | 0.824   | 0.59025847 | NAA40                | -0.905  | 0.47022926 |
| ACACB                | 0.824   | 0.5957514  | MPPED2               | -0.896  | 0.60306144 |
| ZNF81                | 0.823   | 0.59182894 | HRK                  | -0.895  | 0.58628067 |
| ADCK2                | 0.819   | 0.61006708 | IPO5                 | -0.892  | 0.58956067 |
| ACSM3                | 0.818   | 0.6054525  | ZC3H13               | -0.892  | 0.61637212 |
| CASP9                | 0.816   | 0.61038858 | PATZ1                | -0.891  | 0.57701091 |
